# Supplementary material for: Interfacial electronic properties between PtSe2and 2D metal electrodes: a first-principles simulation
Source: Royal Society of Chemistry journal article supplement (doi:10.1039/d2cp05164h), 2023-01-01
Supplement: d2cp05164h1.pdf [file d2cp05164h1.pdf]

## Supporting Information

### Interfacial electronic properties between PtSe<sub>2</sub> and 2D metal electrodes: a first-principles simulation

Xinyue Tian, Wenfei Zhang, Guang-Ping Zhang, Zong-Liang Li, Chuan-Kui Wang\*,  
Minglang Wang\*

*Shandong Key Laboratory of Medical Physics and Image Processing & Shandong Provincial Engineering and Technical Center of Light Manipulations, School of Physics and Electronics, Shandong Normal University, Jinan 250358, China*

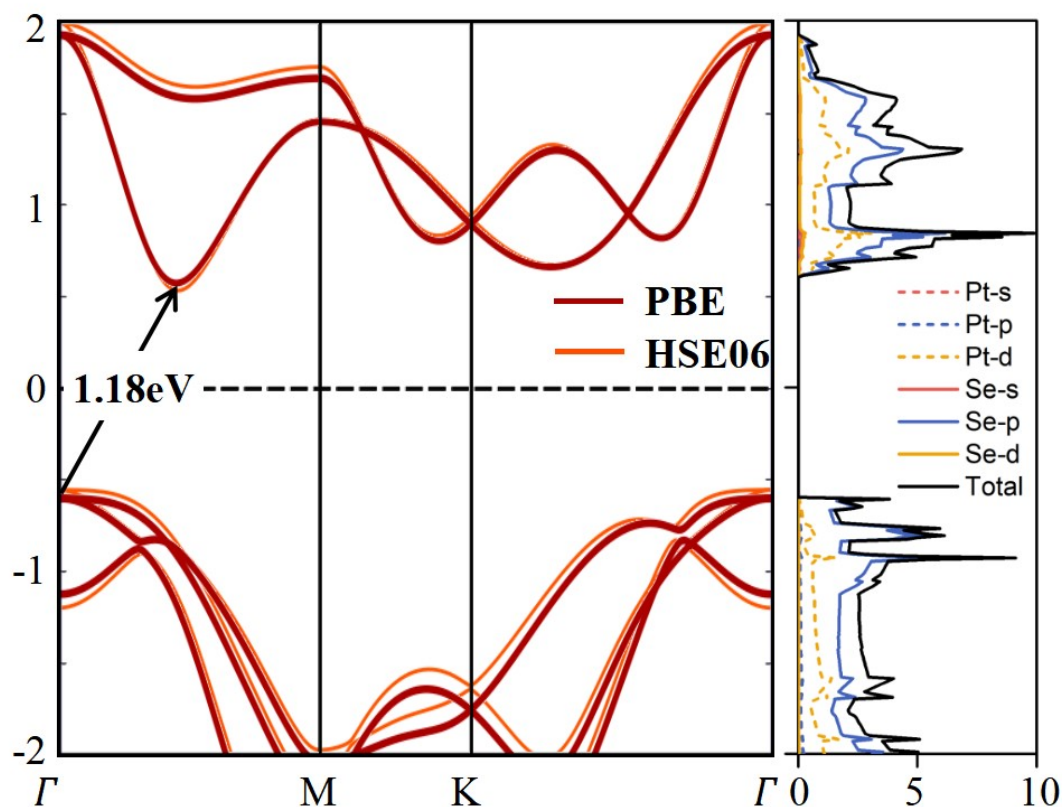

Figure S1. Band structure and PDOS of PtSe<sub>2</sub>. The Fermi level is set to zero energy and represented by the black dashed line.

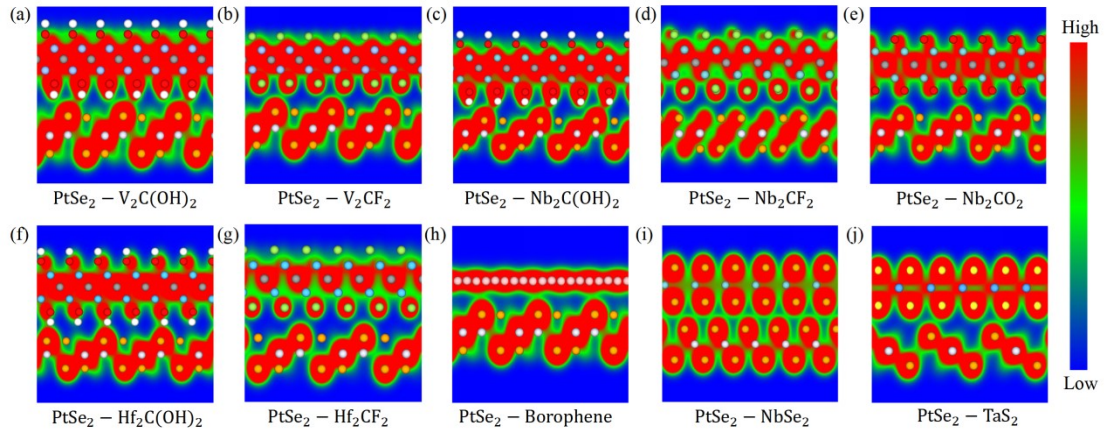

Figure S2. Electron localization function of the  $PtSe_2$ -2D metal.

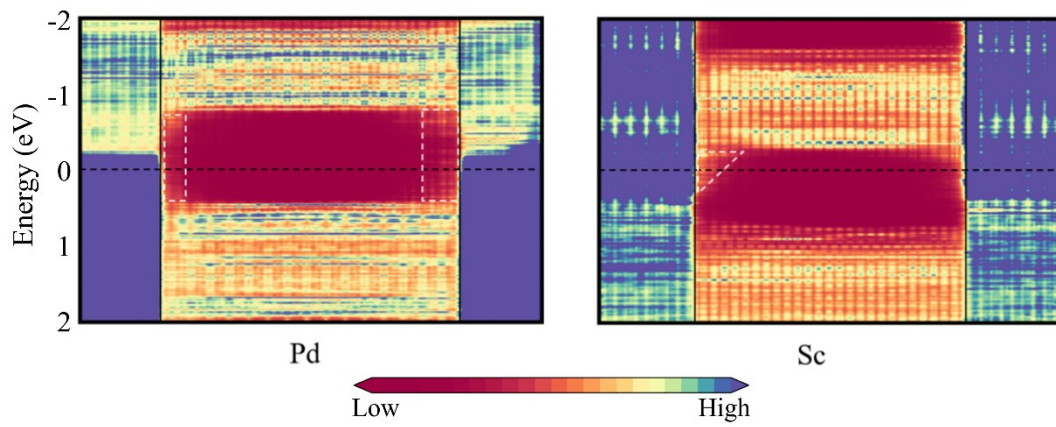

Figure S3. LDDOS of Pd/Sc-PtSe<sub>2</sub> FETs at zero bias voltage. The black dashed line is the Fermi energy level, the white dash box is the MIGs.
